# Supplementary material for: Investigation of non-precious metal cathode catalysts for direct borohydride fuel cells
Source: Royal Society of Chemistry journal article supplement (doi:10.1039/d4ra02767a), 2024-01-01
Supplement: d4ra02767a1.pdf [file d4ra02767a1.pdf]

## Supporting Information

### Investigation of non-precious metal cathode catalysts for direct borohydride fuel cells

*Yu Guo,<sup>a</sup> Yingjian Cao,<sup>a</sup> Qinggang Tan,<sup>b</sup> Daijun Yang,<sup>a</sup> Yong Che,<sup>c</sup> Cunman Zhang,<sup>a</sup>  
Pingwen Ming,<sup>a</sup> and Qiangfeng Xiao<sup>a\*</sup>*

---

<sup>a</sup>School of Automotive Studies & Clean Energy Automotive Engineering Center,  
Tongji University (Jiading Campus), 4800 Cao'an Road, Shanghai 201804, China

<sup>b</sup>School of Materials Science & Engineering, Tongji University (Jiading Campus),  
4800 Cao'an Road, Shanghai, 201804, China

<sup>c</sup>Enpower Beijing Corp. 13 Area 2 Jinsheng Street, Daxing, Beijing, 06500

\*Corresponding Authors. E-mail: xiaoqf@tongji.edu.cn (Q.X.).

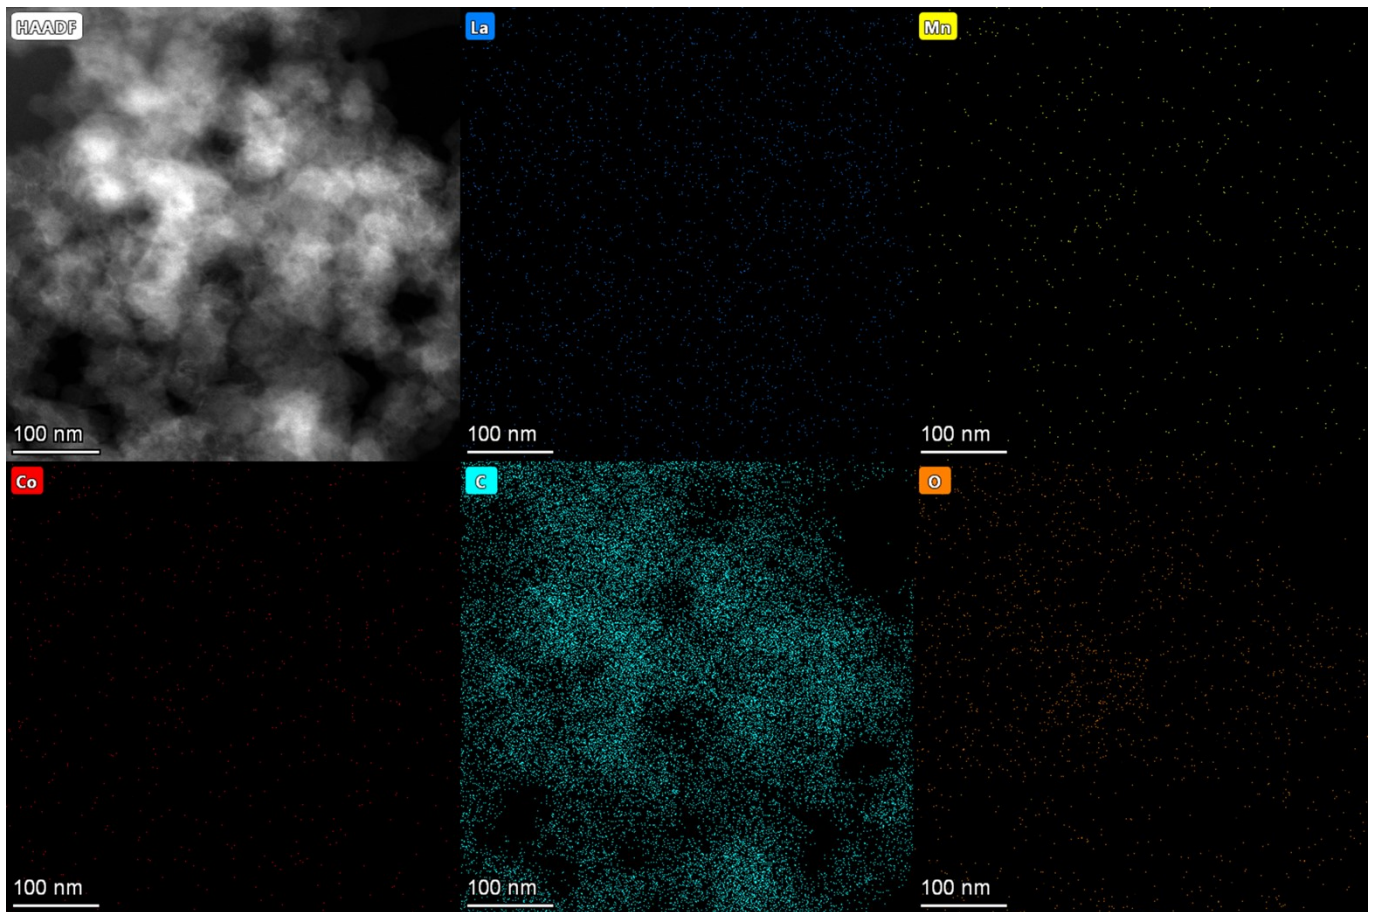

**Figure S1.** HAADF-TEM and EDS elemental mapping image of pristine LMCO electrode.

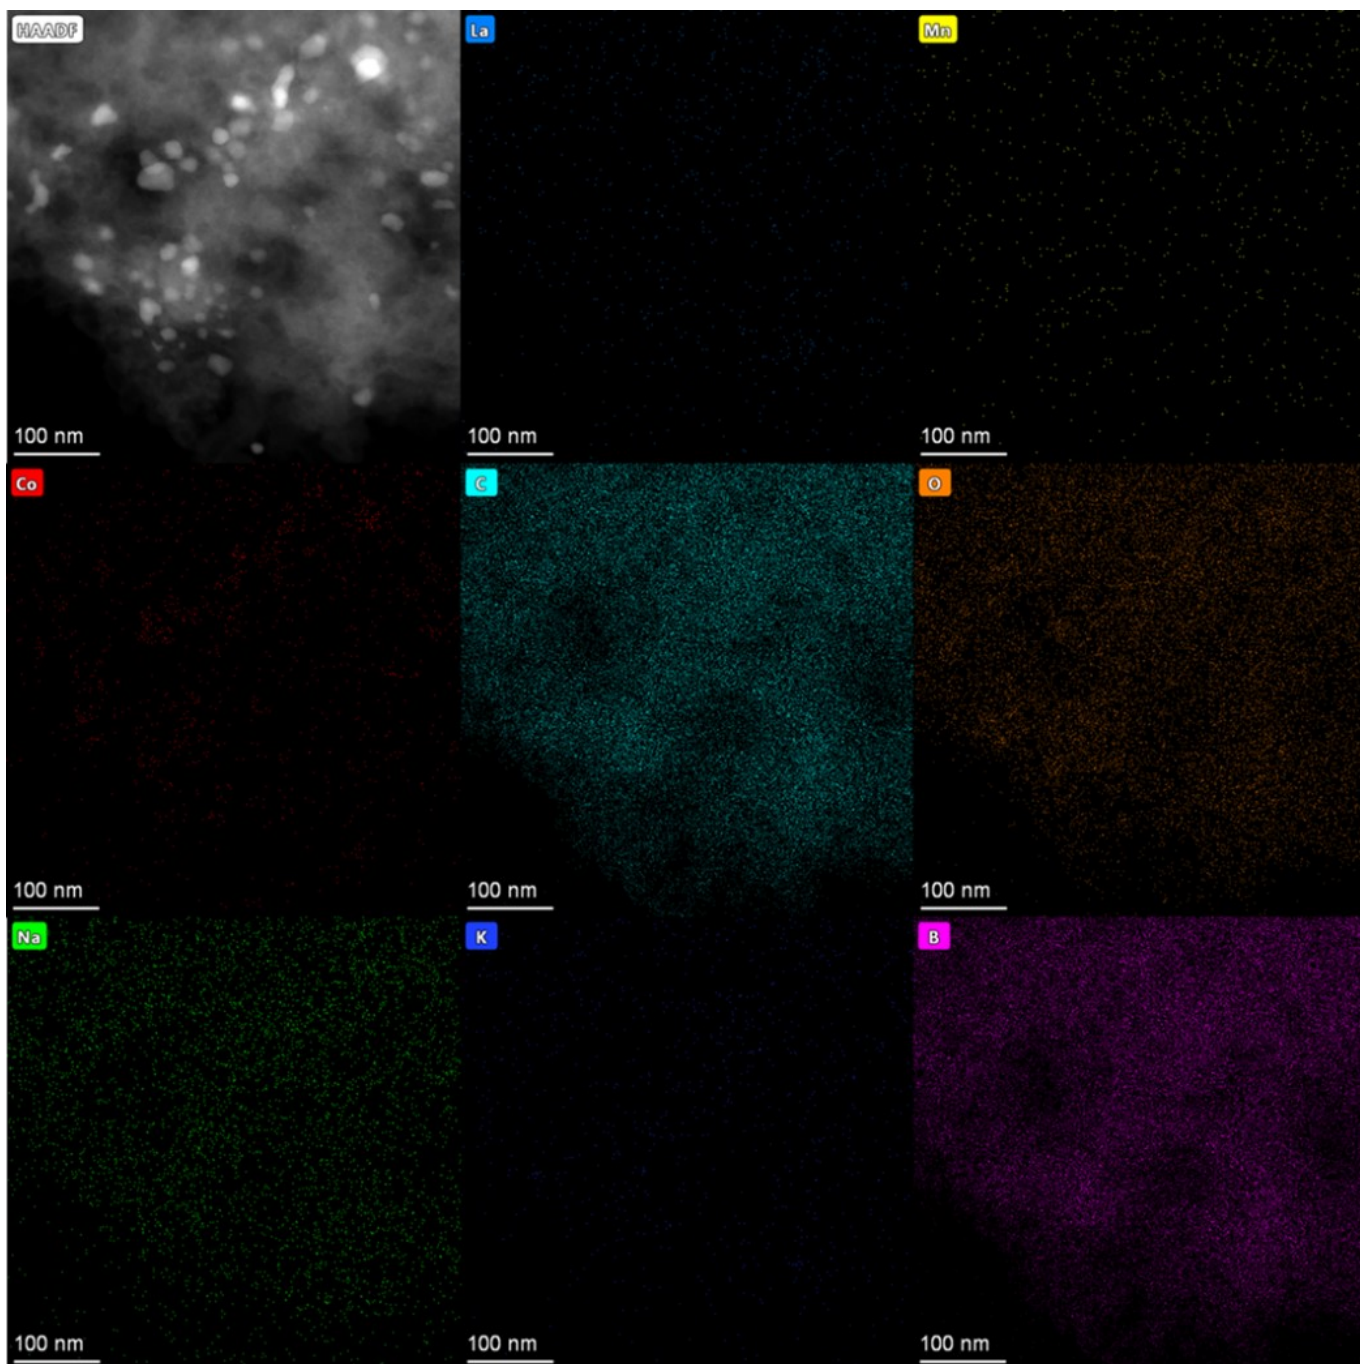

**Figure S2.** HAADF-TEM and EDS elemental mapping image of LMCO electrode after durability test.

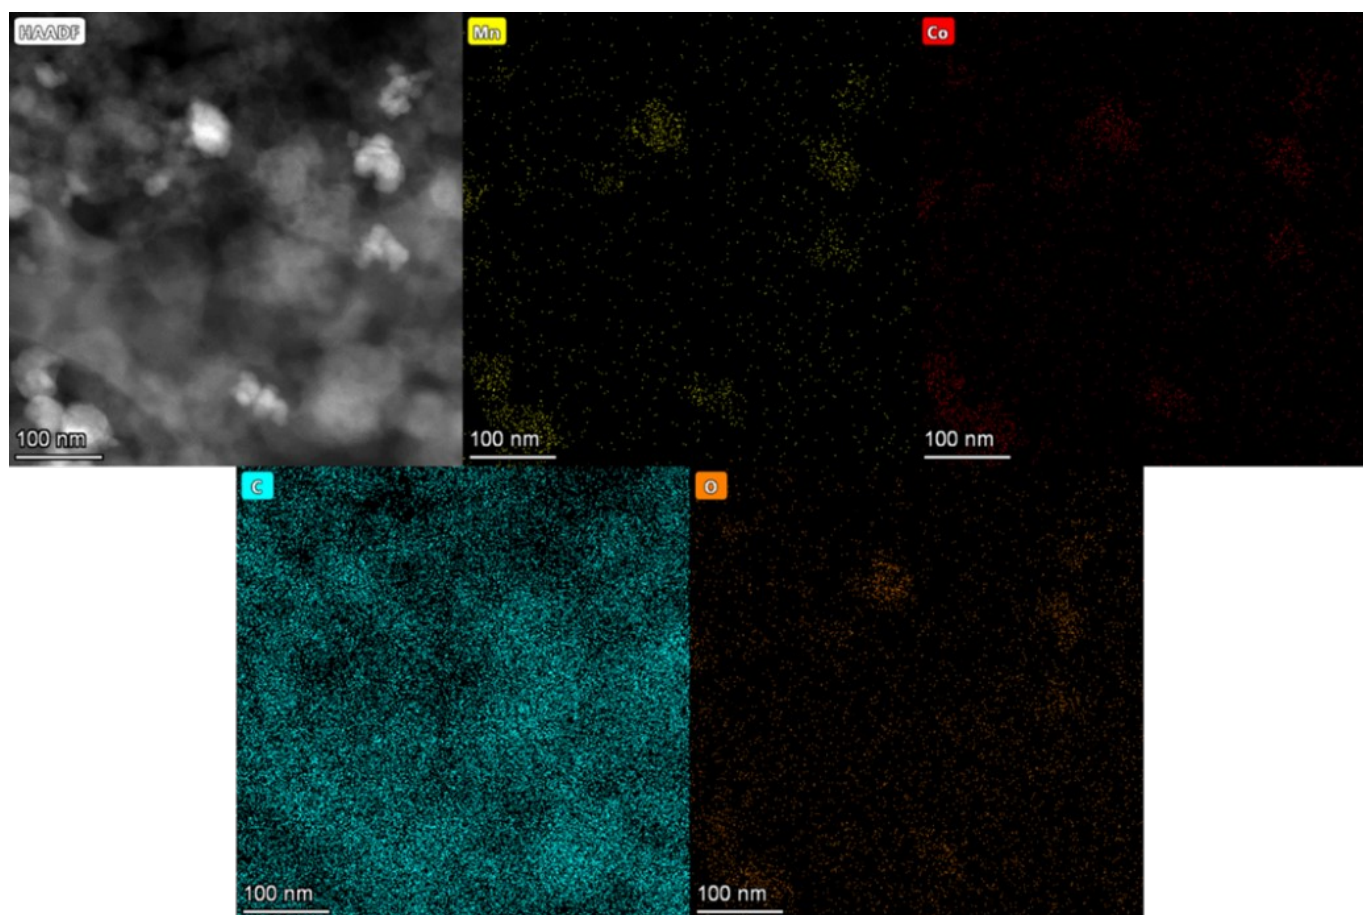

**Figure S3.** HAADF-TEM and EDS elemental mapping image of pristine MCS electrode.



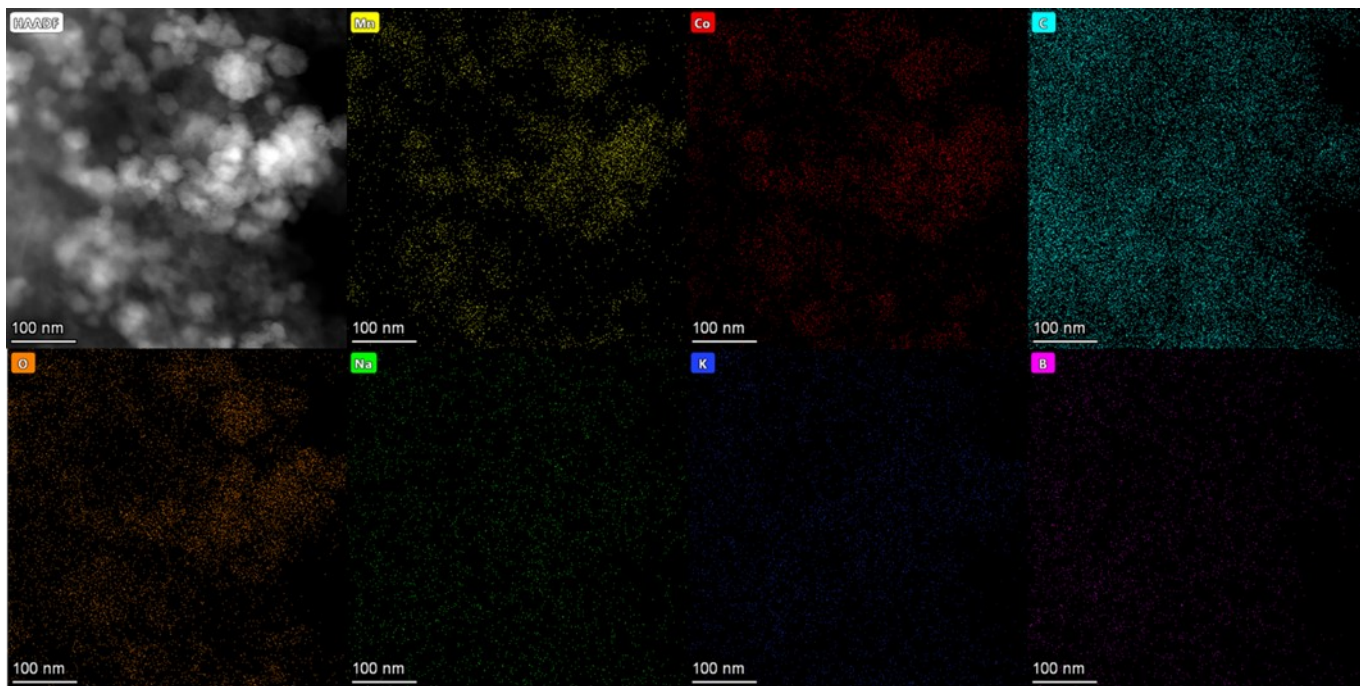

**Figure S4.** HAADF-TEM and EDS elemental mapping image of MCS electrode after durability test.

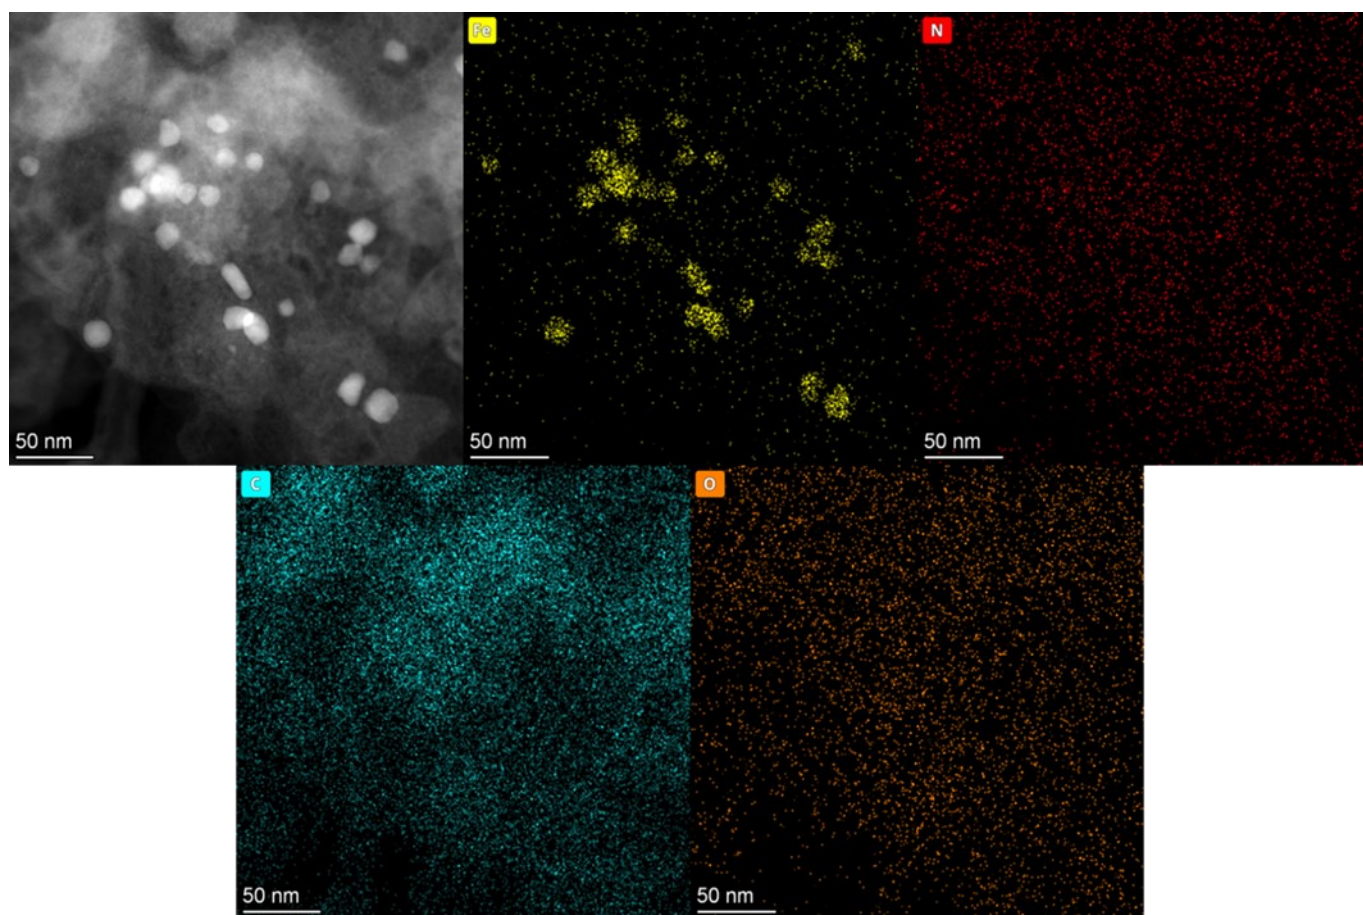

**Figure S5.** HAADF-TEM and EDS elemental mapping image of pristine Fe-N-C electrode.

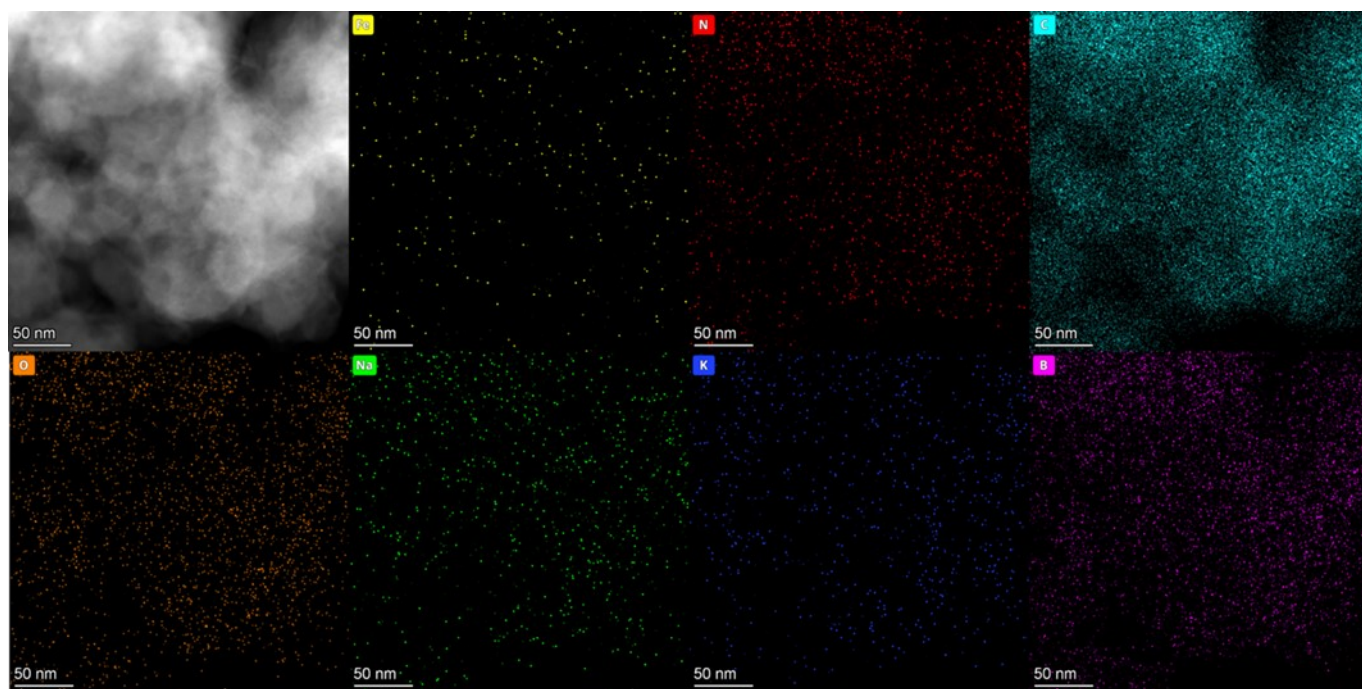

**Figure S6.** HAADF-TEM and EDS elemental mapping image of Fe-N-C electrode after durability test.

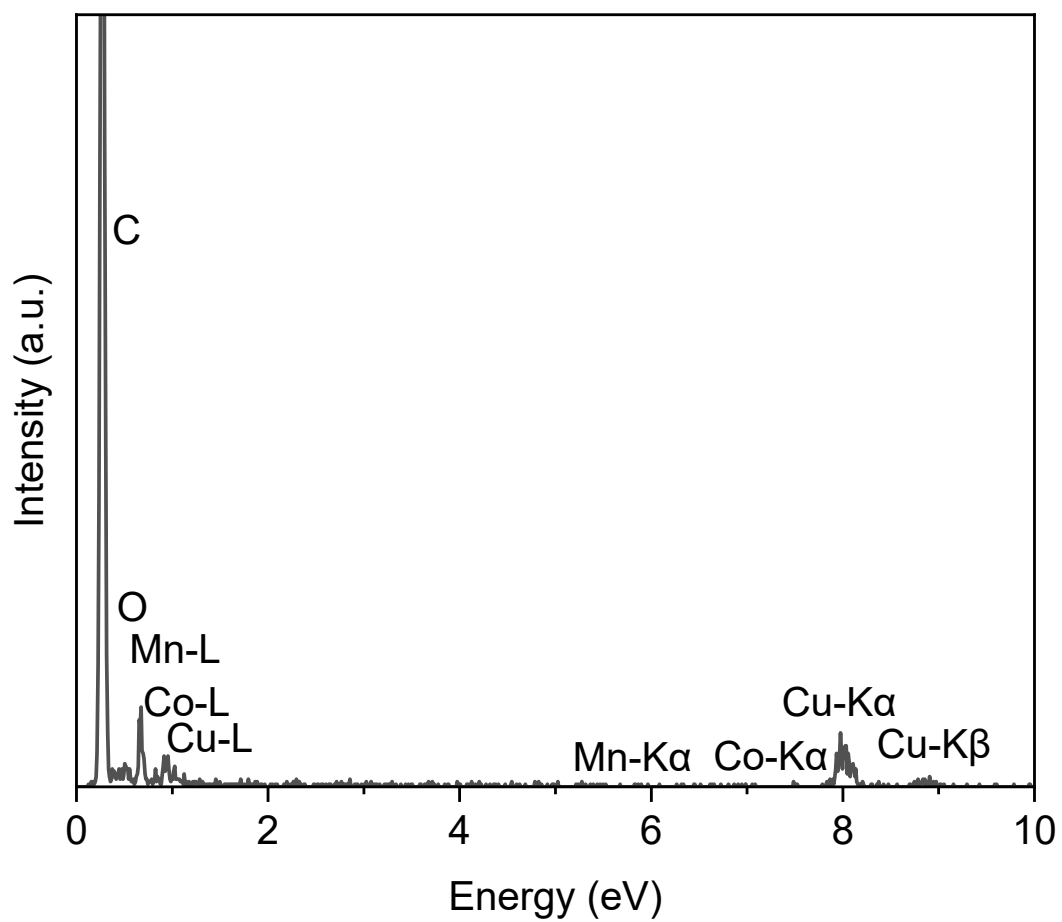

**Figure S7.** EDS elemental spectrum of pristine LMCO electrode.



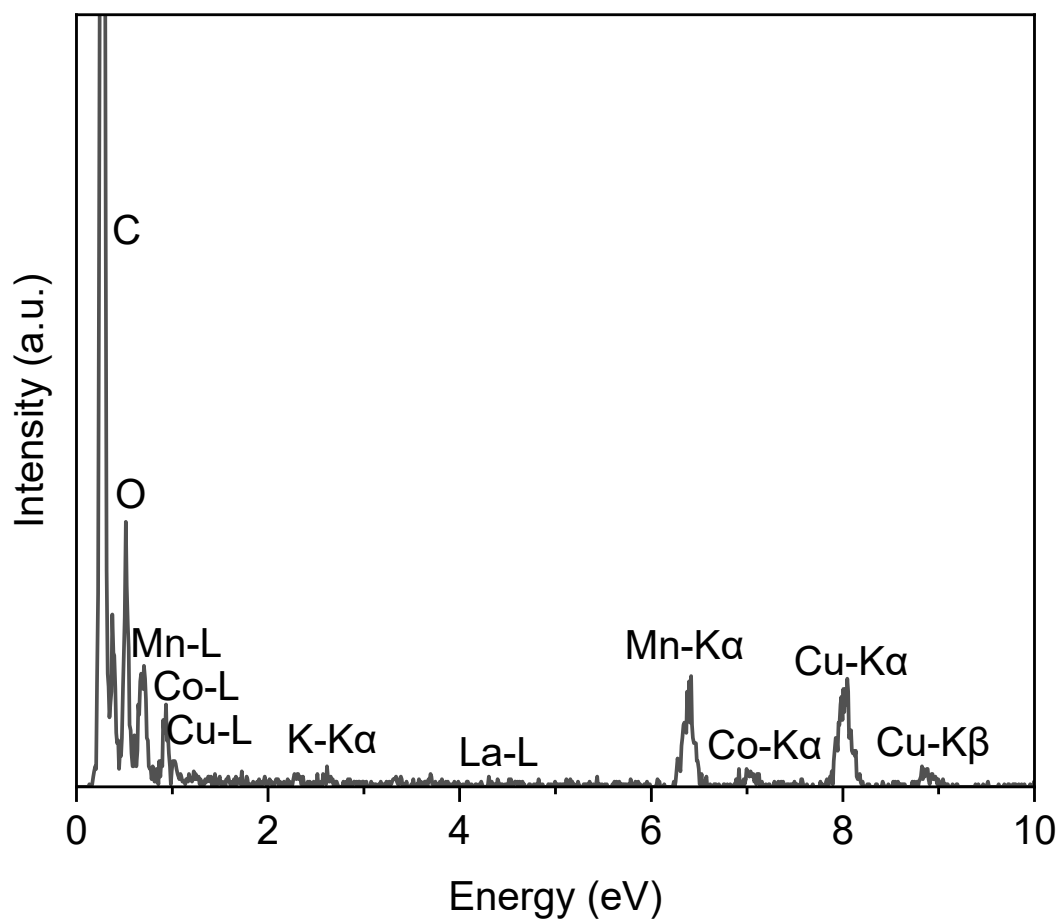

**Figure S8.** EDS elemental spectrum of LMCO electrode after durability test.

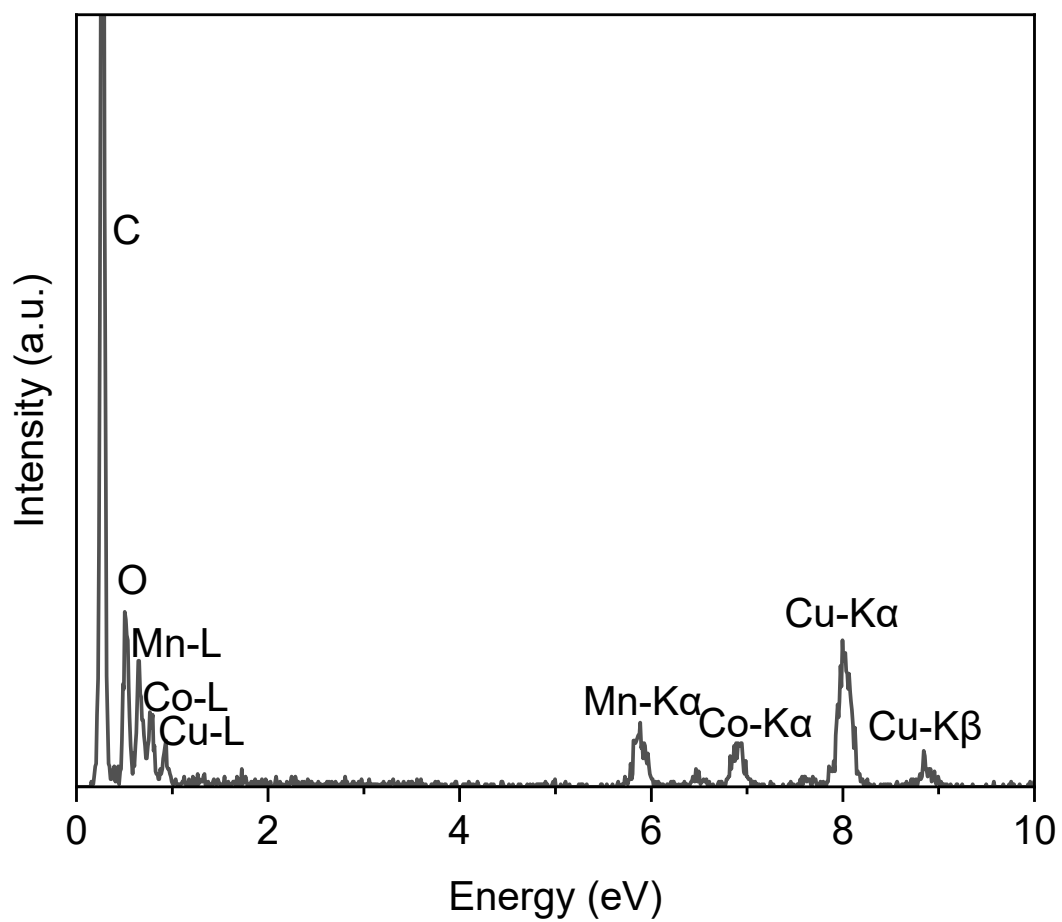

**Figure S9.** EDS elemental spectrum of pristine MCS electrode.

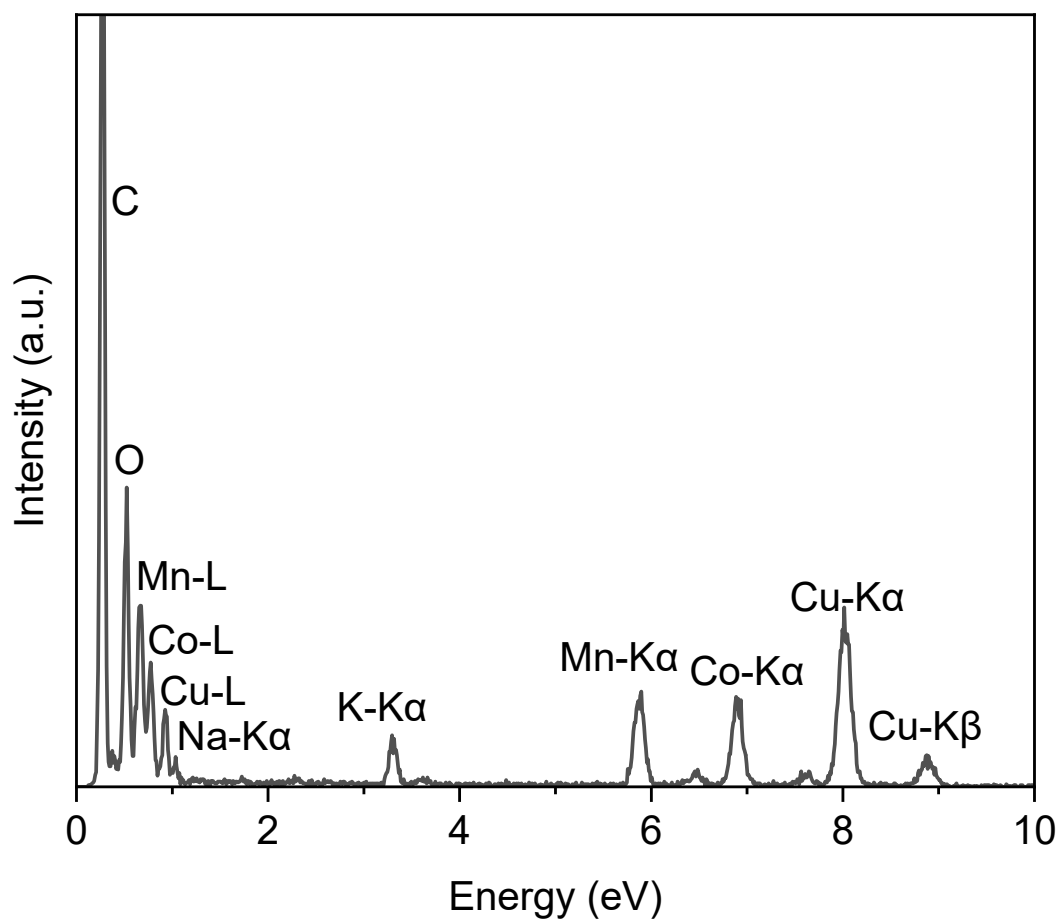

**Figure S10.** EDS elemental spectrum of MCS electrode after durability test.

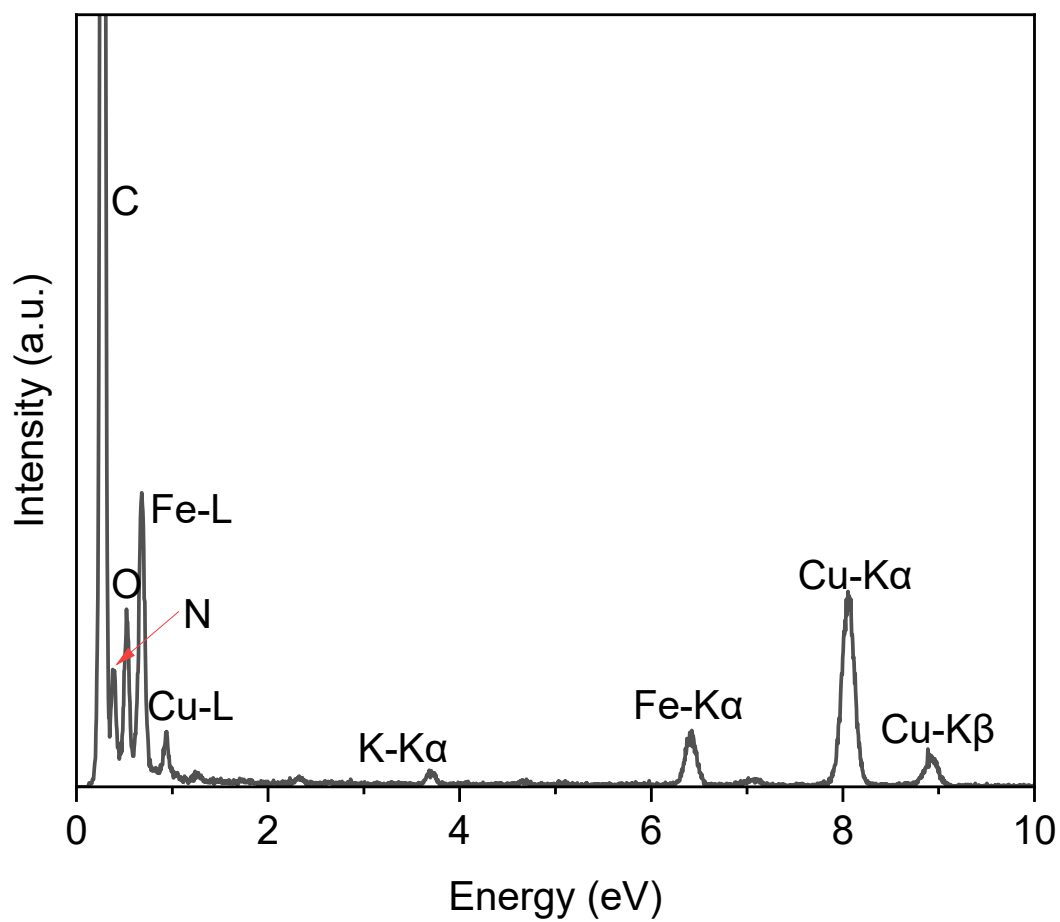

**Figure S11.** EDS elemental spectrum of pristine Fe-N-C electrode.



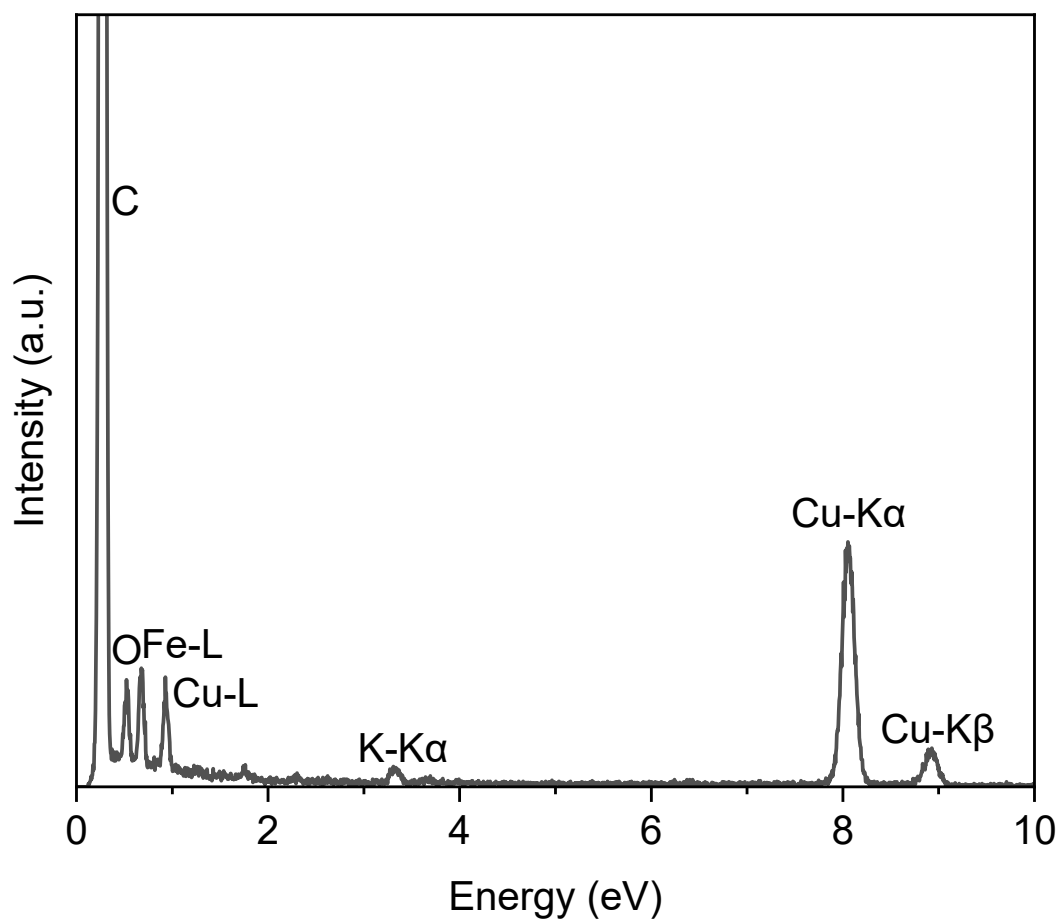

**Figure S12.** EDS elemental spectrum of Fe-N-C electrode after durability test.

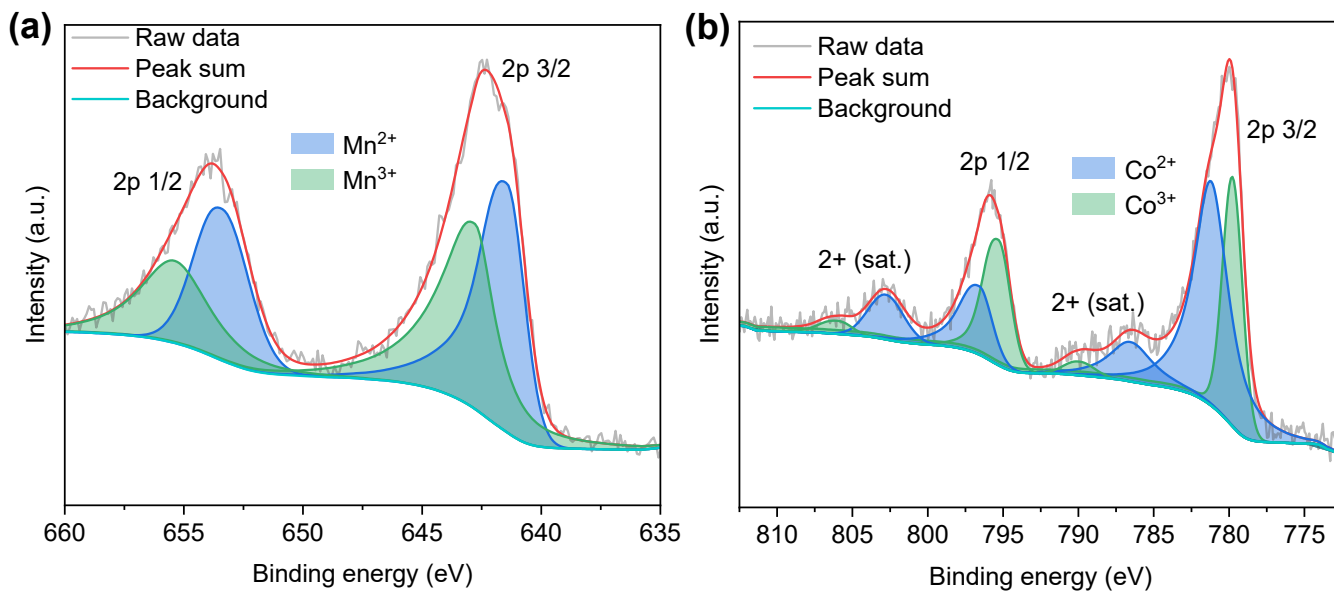

**Figure S13.** XPS high-resolution (a) Mn 2p, and (b) Co 2p spectra of pristine LMCO electrode.

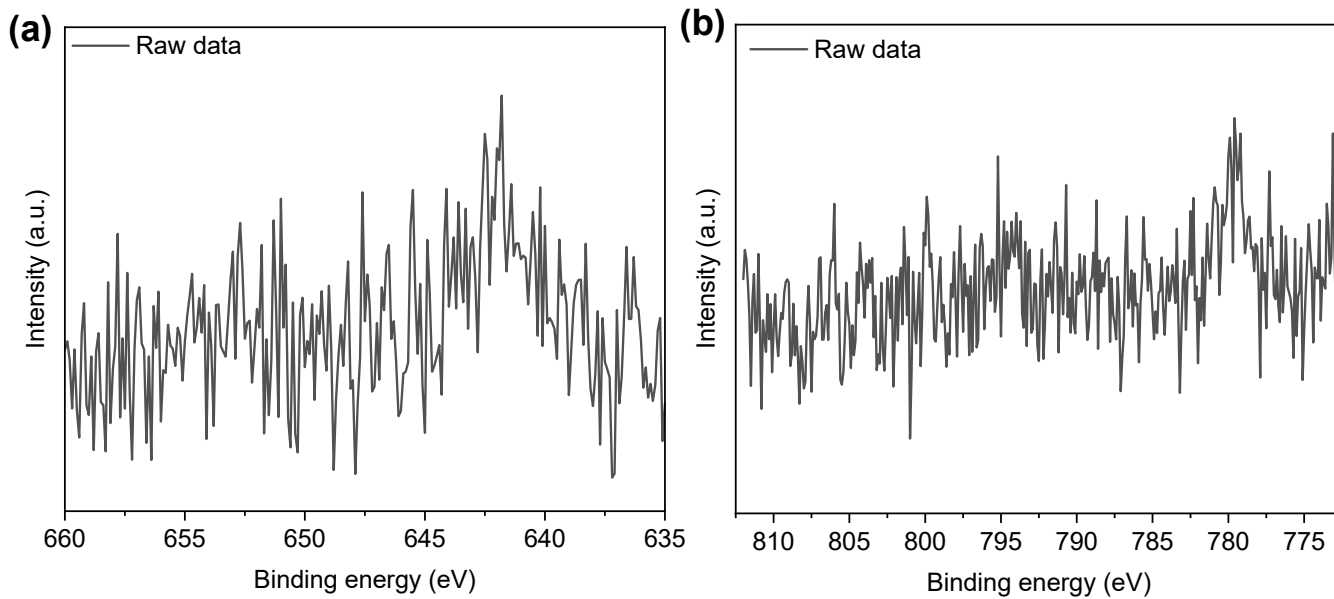

**Figure S14.** XPS high-resolution (a) Mn 2p, and (b) Co 2p spectra of LMCO electrode after durability test.

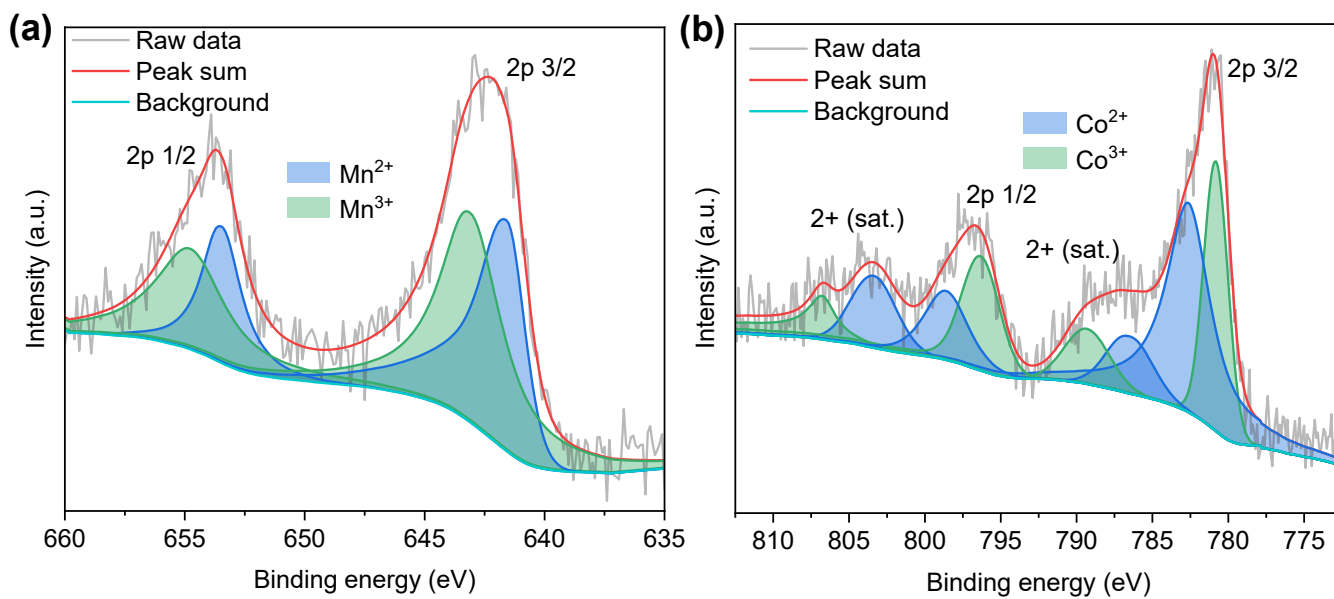

**Figure S15.** XPS high-resolution (a) Mn 2p, and (b) Co 2p spectra of pristine MCS electrode.



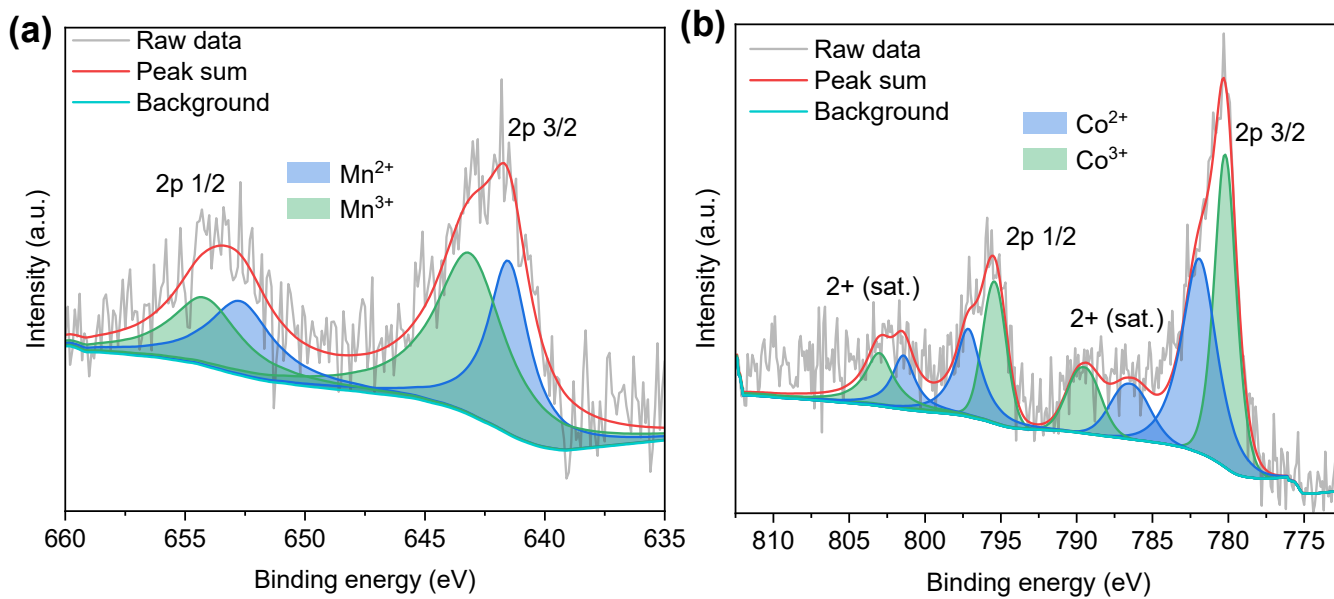

**Figure S16.** XPS high-resolution (a) Mn 2p, and (b) Co 2p spectra of MCS electrode after durability test.

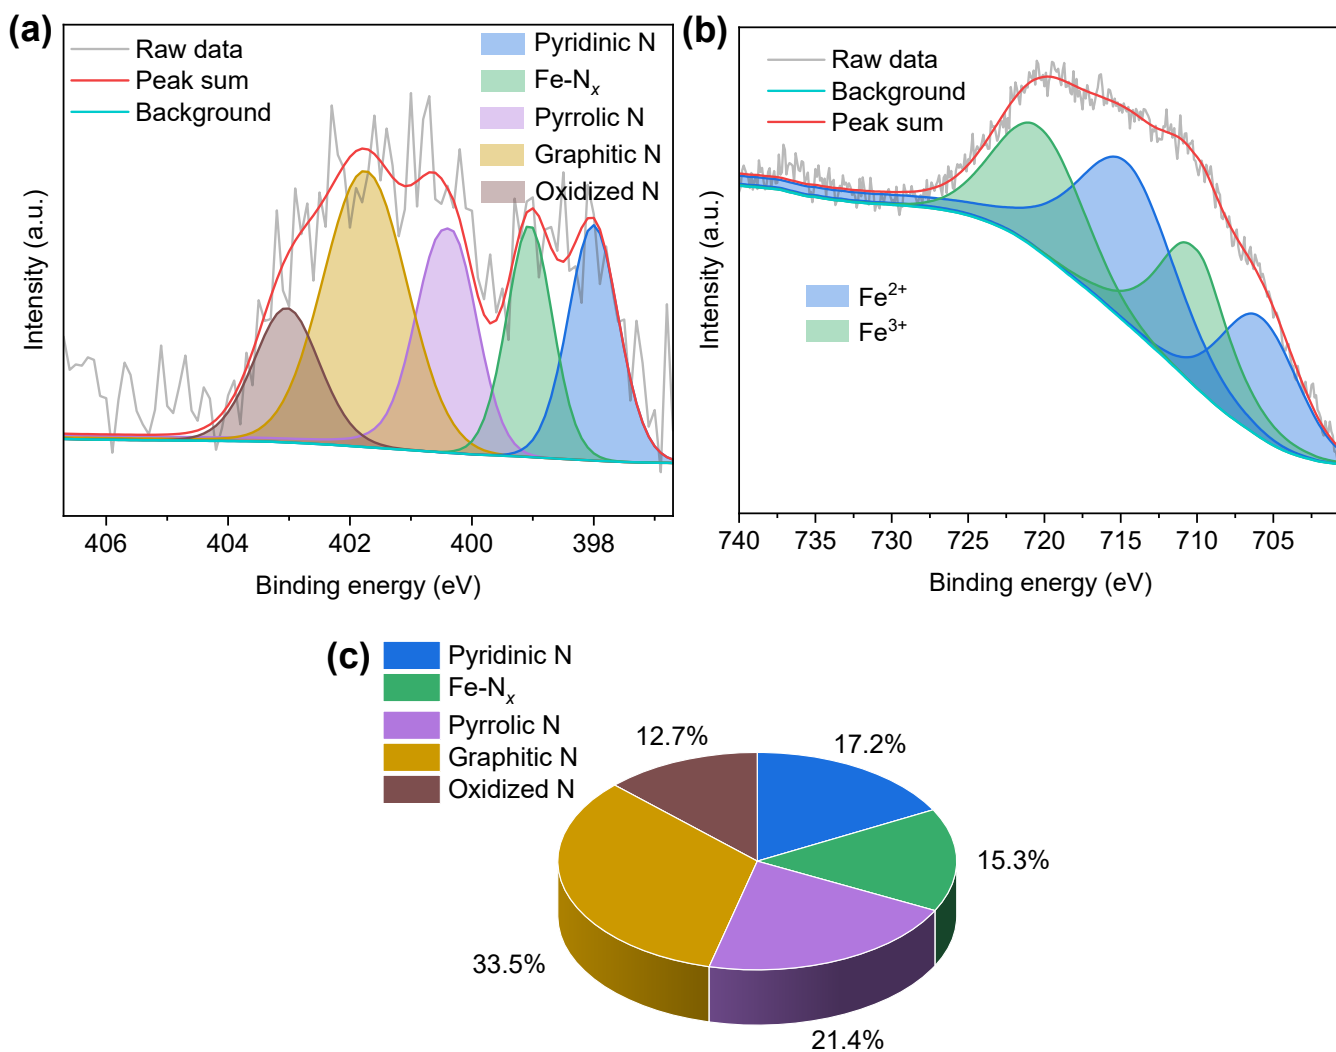

**Figure S17.** XPS high-resolution (a) N 1s, (b) Fe 2p spectra, and (c) comparison of different N species contents of pristine Fe-N-C electrode.

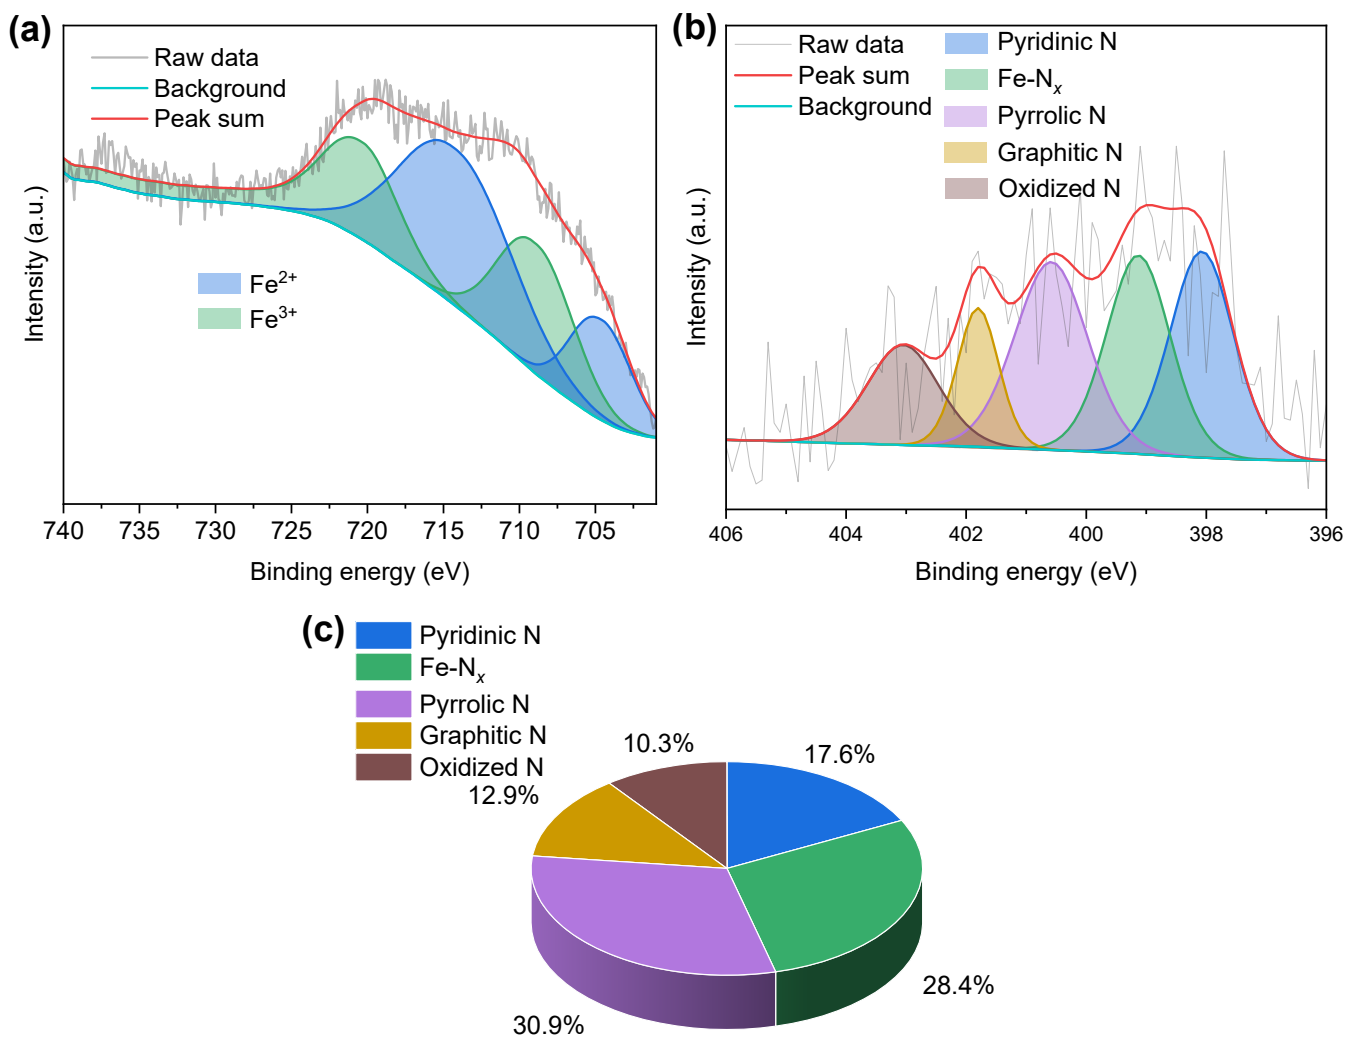

**Figure S18.** XPS high-resolution (a) N 1s, (b) Fe 2p spectra, and (c) comparison of different N species contents of Fe-N-C electrode after durability test.

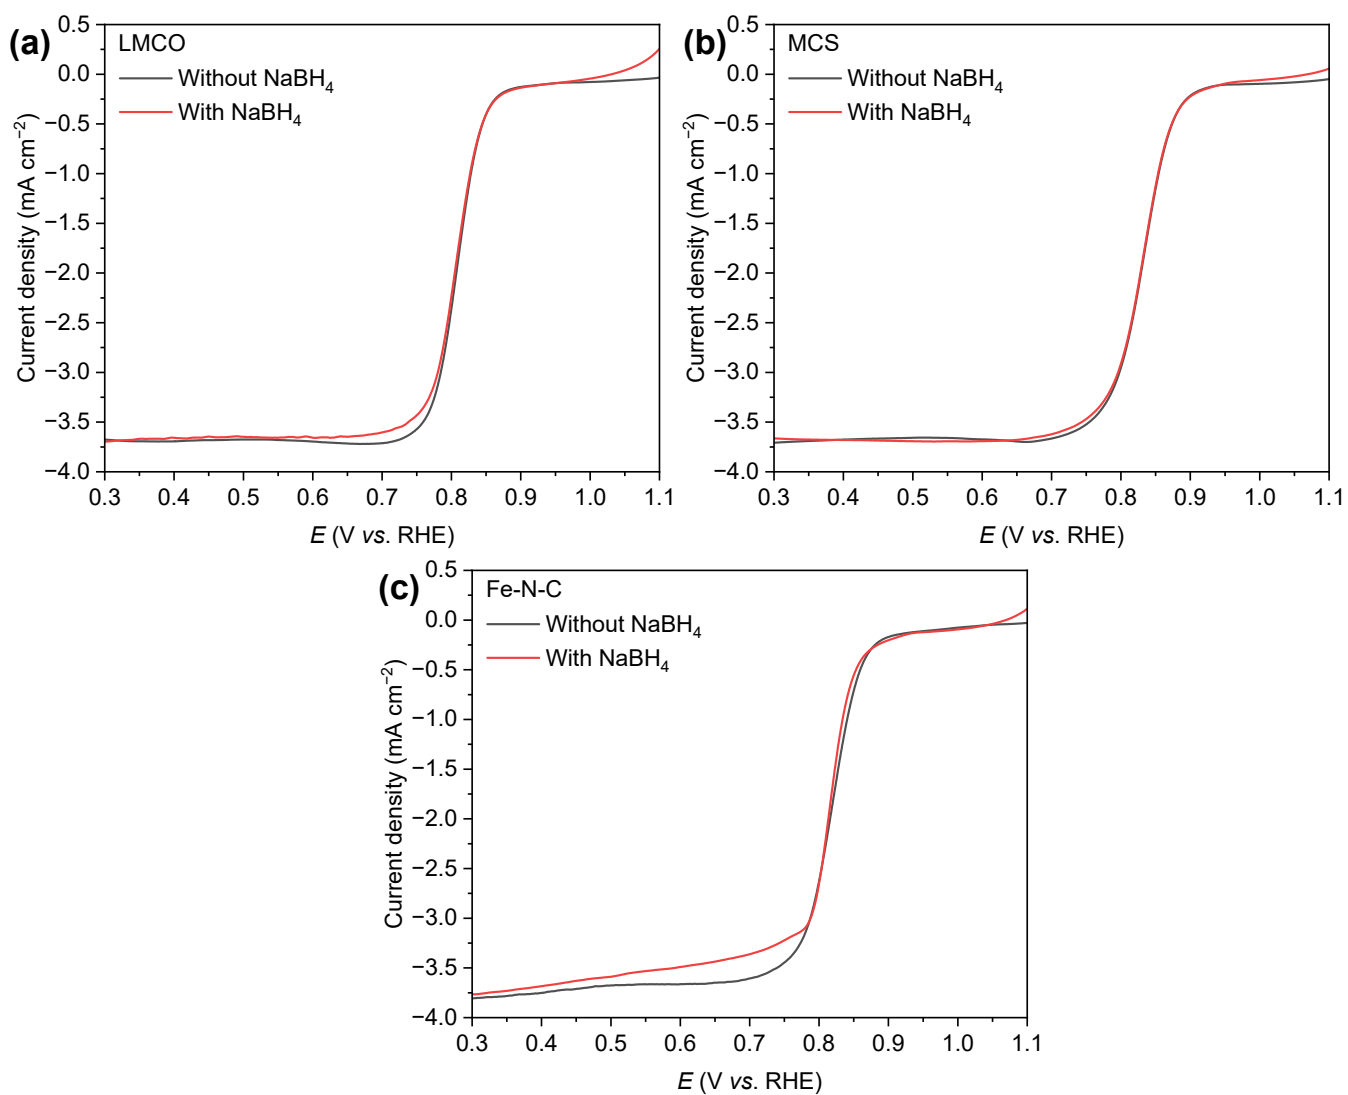

**Figure S19.** ORR polarization curves of (a) LMCO, (b) MCS, and (c) Fe-N-C at 25 °C, 20 mV s<sup>-1</sup>, and 1600 rpm, in O<sub>2</sub>-saturated 1 M KOH solution with or without 10 mM NaBH<sub>4</sub>.



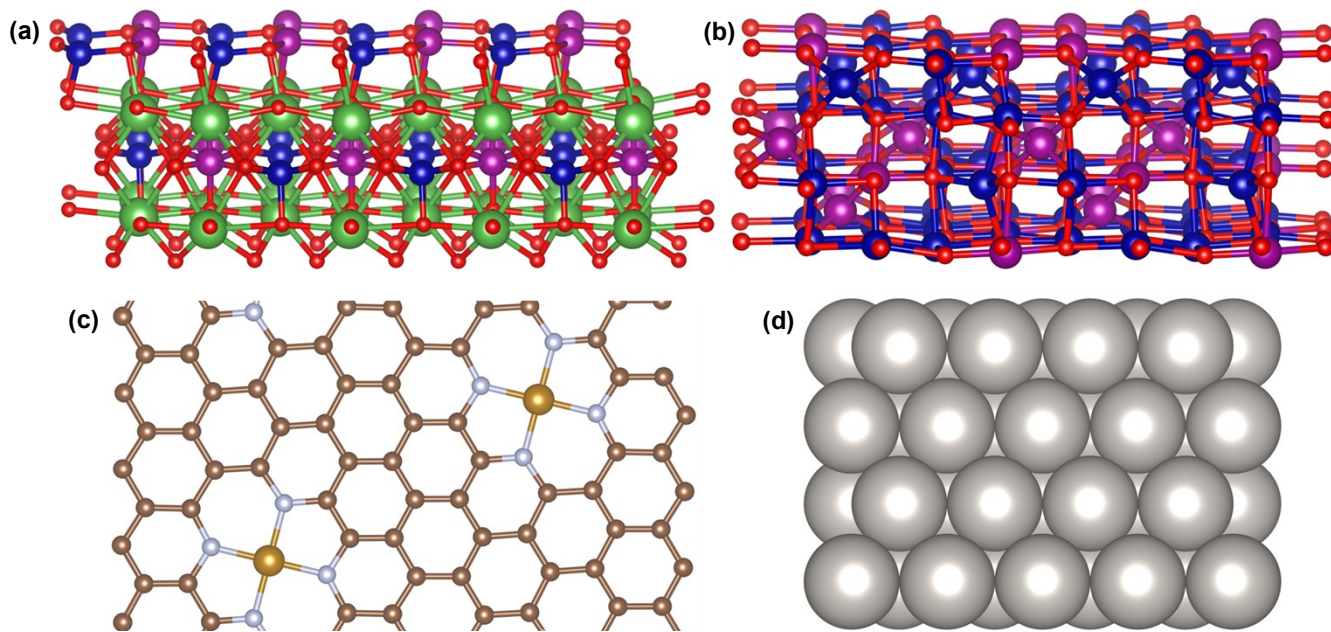

**Figure S20.** DFT optimized structure of (a) LMCO, (b) MCS, (c) Fe-N-C, and (d) Pt.

**Table S1.** Textural properties of the catalysts.

| Sample | $S_{\text{BET}}$<br>( $\text{m}^2 \text{g}^{-1}$ ) | $S_{\text{micro}}$<br>( $\text{m}^2 \text{g}^{-1}$ ) | $S_{\text{meso}}$<br>( $\text{m}^2 \text{g}^{-1}$ ) | Total pore volume<br>( $\text{m}^2 \text{g}^{-1}$ ) |
|--------|----------------------------------------------------|------------------------------------------------------|-----------------------------------------------------|-----------------------------------------------------|
| LMCO   | 1451                                               | 910                                                  | 541                                                 | 2.24                                                |
| MCS    | 1538                                               | 985                                                  | 553                                                 | 2.59                                                |
| Fe-N-C | 734                                                | 427                                                  | 307                                                 | 0.61                                                |

**Table S2.** The comparison of the single cell performance of representative studies.

| Anode catalyst              | Membrane                       | Cathode catalyst                                          | Oxidant                       | Peak power density (mW cm <sup>-2</sup> ) | Ref. |
|-----------------------------|--------------------------------|-----------------------------------------------------------|-------------------------------|-------------------------------------------|------|
| Co-W-B                      | Membraneless                   | LaNi <sub>0.9</sub> Ru <sub>0.1</sub> O <sub>3</sub> /CNT | Air                           | 500                                       | 1    |
| Pd/C + Ni                   | Nafion <sup>®</sup> 117        | Pt/C                                                      | H <sub>2</sub> O <sub>2</sub> | 630                                       | 2    |
| Pd/C + Ni                   | Nafion <sup>®</sup> 117        | Pt/C                                                      | H <sub>2</sub> O <sub>2</sub> | 890                                       | 3    |
| PdNi/C                      | Nafion <sup>®</sup> 117        | Pt/C                                                      | H <sub>2</sub> O <sub>2</sub> | 630                                       | 4    |
| CoO                         | Nafion <sup>®</sup> 211        | RuO <sub>2</sub>                                          | H <sub>2</sub> O <sub>2</sub> | 425                                       | 5    |
| Pd/C + Ni                   | Nafion <sup>®</sup> 117        | Pt/C                                                      | H <sub>2</sub> O <sub>2</sub> | 580                                       | 6    |
| Pt/C                        | Nafion <sup>®</sup> 117        | Pt/C                                                      | H <sub>2</sub> O <sub>2</sub> | 800                                       | 7    |
| PteAu/C                     | Nafion <sup>®</sup> 117        | Pt/C                                                      | H <sub>2</sub> O <sub>2</sub> | 345                                       | 8    |
| Ni+Pd/C                     | Nafion <sup>®</sup>            | Pt/C                                                      | H <sub>2</sub> O <sub>2</sub> | 590                                       | 9    |
| AB <sub>5</sub> alloy       | Nafion <sup>®</sup> 117        | Pt/C                                                      | H <sub>2</sub> O <sub>2</sub> | 352                                       | 10   |
| AB <sub>5</sub> alloy       | Nafion <sup>®</sup> 117        | Pd/C                                                      | H <sub>2</sub> O <sub>2</sub> | 589                                       | 11   |
| Ni particle on Ni felt      | Nafion <sup>®</sup> 117        | Pt/C                                                      | H <sub>2</sub> O <sub>2</sub> | 446                                       | 12   |
| Pd–Ni/N-rGO                 | Nafion <sup>®</sup> 117        | Pt/C                                                      | H <sub>2</sub> O <sub>2</sub> | 353.84                                    | 13   |
| Core (Ni)-Shell (Pd)/rGP1   | Nafion <sup>®</sup>            | Pt/C                                                      | H <sub>2</sub> O <sub>2</sub> | 339.1                                     | 14   |
| Pt/[TaOPO <sub>4</sub> /VC] | Nafion <sup>®</sup> 117        | Pt/C                                                      | H <sub>2</sub> O <sub>2</sub> | 360                                       | 15   |
| nanoporous Au               | Nafion <sup>®</sup> 212        | nanoporous Au                                             | H <sub>2</sub> O <sub>2</sub> | 390                                       | 16   |
| Au                          | Nafion <sup>®</sup>            | Pd                                                        | H <sub>2</sub> O <sub>2</sub> | 680                                       | 17   |
| Au                          | Nafion <sup>®</sup>            | Pd                                                        | H <sub>2</sub> O <sub>2</sub> | 680                                       | 17   |
| Au                          | Nafion <sup>®</sup>            | Pd                                                        | H <sub>2</sub> O <sub>2</sub> | 1500                                      | 18   |
| Zn foil                     | Nafion <sup>®</sup> 117        | Pt                                                        | H <sub>2</sub> O <sub>2</sub> | 528                                       | 19   |
| Ni + Pt/C                   | Nafion <sup>®</sup> 212        | Pd                                                        | H <sub>2</sub> O <sub>2</sub> | 665                                       | 20   |
| Ni + Pd/C                   | Polymer electrolyte membrane   | Pt/C                                                      | H <sub>2</sub> O <sub>2</sub> | 810                                       | 21   |
| Pt–Ru                       | Nafion <sup>®</sup> 115        | Pd–Ir                                                     | H <sub>2</sub> O <sub>2</sub> | 345                                       | 22   |
| Pd/C                        | A-006 (AEM)                    | Fe–Co                                                     | O <sub>2</sub>                | 890                                       | 23   |
| Ni/C                        | Nafion <sup>®</sup> 212        | Hypermec <sup>™</sup> K14                                 | O <sub>2</sub>                | 460                                       | 24   |
| Pd/C + Ni                   | triphosphate chitosan hydrogel | Pt/C                                                      | O <sub>2</sub>                | 685                                       | 25   |
| Pd/C + Ni                   | cross-linked chitosan          | Pt/C                                                      | O <sub>2</sub>                | 450                                       | 26   |
| Ni-based thin film          | chitosan hydrogel (AEM)        | Pt/C                                                      | O <sub>2</sub>                | 429                                       | 27   |
| Co–pyrrole/MPC              | Nafion <sup>®</sup> 112        | Pt/C                                                      | O <sub>2</sub>                | 325                                       | 28   |
| Pd decorated Ni–Co/C        | AEM                            | Fe–Co/C                                                   | O <sub>2</sub>                | 761                                       | 29   |

|                                 |                               |                             |                               |      |              |
|---------------------------------|-------------------------------|-----------------------------|-------------------------------|------|--------------|
| CoO                             | polymer fiber<br>membrane     | LaNiO <sub>3</sub>          | O <sub>2</sub>                | 663  | 30           |
| Co(OH) <sub>2</sub> -PPy-<br>BP | Nafion <sup>®</sup> 212       | CoO Nanorods/C              | O <sub>2</sub>                | 410  | 31           |
| Co(OH) <sub>2</sub> -PPy-<br>BP | Co-PVA & PVA<br>bilayer (AEM) | Co(OH) <sub>2</sub> -PPy-BP | O <sub>2</sub>                | 327  | 32           |
| Co(OH) <sub>2</sub> -PPy-<br>BP | AEM                           | Co(OH) <sub>2</sub> -PPy-BP | O <sub>2</sub>                | 500  | 33           |
| NiFe-2                          | Nafion <sup>®</sup> 117       | Pt/C                        | H <sub>2</sub> O <sub>2</sub> | 540  | 34           |
| Ni@NiP                          | Nafion <sup>®</sup> 117       | Pt/C                        | H <sub>2</sub> O <sub>2</sub> | 474  | 35           |
| Pt/C                            | Alkymer <sup>®</sup>          | Mn-Co Spinel                | O <sub>2</sub>                | 1518 | This<br>work |

---

## References

- 1 S. Li, X. Yang, H. Zhu, X. Wei and Y. Liu, *Int. J. Hydrog. Energy*, 2013, **38**, 2884–2888.
- 2 Z. Wang, J. Parrondo, C. He, S. Sankarasubramanian and V. Ramani, *Nat. Energy*, 2019, **4**, 281–289.
- 3 Z. Wang, S. Sankarasubramanian and V. Ramani, *Cell Rep. Phys. Sci.*, 2020, **1**, 100084.
- 4 S. Saha, P. Gayen, Z. Wang, R. J. Dixit, K. Sharma, S. Basu and V. K. Ramani, *ACS Catal.*, 2021, **11**, 8417–8430.
- 5 X. Yang, X. Wei, C. Liu and Y. Liu, *Mater. Chem. Phys.*, 2014, **145**, 269–273.
- 6 Z. Wang, M. Mandal, S. Sankarasubramanian, G. Huang, P. A. Kohl and V. K. Ramani, *ACS Appl. Energy Mater.*, 2020, **3**, 4449–4456.
- 7 N. Luo, G. H. Miley, J. Mather, R. Burton, G. Hawkins, R. Gimlin, J. Rusek, T. I. Valdez and S. R. Narayanan, *AIP Conf. Proc.*, 2006, **813**, 209–221.
- 8 O. Okur, E. Alper and A. Almansoori, *Energy*, 2014, **67**, 97–105.
- 9 Y. Ko, L. Lombardo, M. Li, T. H. M. Pham, H. Yang and A. Züttel, *Adv. Energy Mater.*, 2022, **12**, 2103539.
- 10 R. K. Raman, N. A. Choudhury and A. K. Shukla, *Electrochem. Solid-State Lett.*, 2004, **7**, A488.
- 11 N. A. Choudhury, J. Ma, Y. Sahai and R. G. Buchheit, *J. Power Sources*, 2011, **196**, 5817–5822.
- 12 G. Braesch, Z. Wang, S. Sankarasubramanian, A. G. Oshchepkov, A. Bonnefont, E. R. Savinova, V. Ramani and M. Chatenet, *J. Mater. Chem. A*, 2020, **8**, 20543–20552.
- 13 M. G. Hosseini, V. Daneshvari-Esfahlan, S. Wolf and V. Hacker, *ACS Appl. Energy Mater.*, 2021, **4**, 6025–6039.
- 14 R. Mahmoodi, M. G. Hosseini and H. Rasouli, *Appl. Catal., B*, 2019, **251**, 37–48.
- 15 R. M. E. Hjelm, Y. Garsany, C. Lafforgue, M. Chatenet and K. Swider-Lyons, *ECS Trans.*, 2018, **86**, 659.
- 16 W. Jin, J. Liu, Y. Wang, Y. Yao, J. Gu and Z. Zou, *Int. J. Hydrog. Energy*, 2013, **38**, 10992–10997.
- 17 L. Gu, N. Luo and G. H. Miley, *J. Power Sources*, 2007, **173**, 77–85.
- 18 N. Luo, G. H. Miley, K.-J. Kim, R. Burton and X. Huang, *J. Power Sources*, 2008, **185**, 685–690.
- 19 D. M. F. Santos and C. a. C. Sequeira, *J. Electrochem. Soc.*, 2009, **157**, B13.
- 20 J. Ma, Y. Sahai and R. G. Buchheit, *J. Power Sources*, 2010, **195**, 4709–4713.
- 21 N. A. Choudhury, J. Ma and Y. Sahai, *J. Power Sources*, 2012, **210**, 358–365.
- 22 D. Cao, D. Chen, J. Lan and G. Wang, *J. Power Sources*, 2009, **190**, 346–350.
- 23 M. Zhiani, I. Mohammadi and N. Salehi, *RSC Adv.*, 2015, **5**, 23635–23645.
- 24 G. Braesch, A. G. Oshchepkov, A. Bonnefont, F. Asonkeng, T. Maurer, G. Maranzana, E. R. Savinova and M. Chatenet, *ChemElectroChem*, 2020, **7**, 1789–1799.
- 25 J. Ma, Y. Sahai and R. G. Buchheit, *J. Power Sources*, 2012, **202**, 18–27.
- 26 J. Ma, N. A. Choudhury, Y. Sahai and R. G. Buchheit, *J. Power Sources*, 2011, **196**, 8257–8264.
- 27 J. Ma and Y. Sahai, *ECS Electrochem. Lett.*, 2012, **1**, F41.
- 28 Y. Chen, S. Wang and Z. Li, *RSC Adv.*, 2020, **10**, 29119–29127.
- 29 M. Zhiani and I. Mohammadi, *Fuel*, 2016, **166**, 517–525.
- 30 X. Yang, Y. Liu, S. Li, X. Wei, L. Wang and Y. Chen, *Sci. Rep.*, 2012, **2**, 567.
- 31 J. Jia, X. Li, H. Qin, Y. He, H. Ni and H. Chi, *J. Alloy. Compd.*, , DOI:10.1016/j.jallcom.2019.153065.
- 32 X. Li, H. Chen, W. Chu, H. Qin, W. Zhang, H. Ni, H. Chi, Y. He, Y. S. Chu, J. Hu and J. Liu, *ACS*

*Appl. Mater. Inter.*, 2020, **12**, 27184–27189.

33 J. Wei, X. Han, X. Li, H. Qin, H. Yin, W. Zhang, H. Ni and X. Wang, *RSC Adv.*, 2022, **12**, 28707–28711.

34 Y. Yang, X. Zhu, C. Yi, H. Yang, X. Hou, X. Liao, C. Chen, D. Yu and X. Zhou, *Chem. Eng. J.*, 2023, **472**, 145097.

35 B. Hu, Y. Xie, Y. Yang, J. Meng, J. Cai, C. Chen, D. Yu and X. Zhou, *Appl. Catal., B*, 2023, **324**, 122257.
